# Supplementary material for: Sustained Effect of a Brief Video in Reducing Public Stigma Toward Individuals With Psychosis: A Randomized Controlled Trial of Young Adults
Source: Atypon-hosted journal article supplement (doi:10.1176/appi.ajp.2020.20091293), 2021-04-26
Supplement: appi.ajp.2020.20091293.ds001.pdf [file appi.ajp.2020.20091293.ds001.pdf]

Online supplement for Amsalem et al., Sustained Effect of a Brief Video in Reducing Public Stigma Toward Individuals With Psychosis: A Randomized Controlled Trial of Young Adults. Am J Psychiatry (doi: 10.1176/appi.ajp.2020.20091293)

### Written Vignette and a Link to an Early Psychosis Program

Anne is a 22-year old African-American woman second-year Philosophy student with close friends who works as a customer service provider. Anne was doing well until two years ago when she was recovering from the death of her Dad. She feels that “Every day is a battle... every day is hard because it is not easy going outside, taking the train, being around people, providing customer services, when you think the world is just out to get you.” She went four days without sleeping while “I locked myself in my room and I had no connection with anyone.” She also started to experience things like “hearing voices and seeing things that were not there.” Later on, Anne was diagnosed with schizophrenia. Today she says: “I am just another person with schizophrenia, and it is not the end of the world. It is not something that is impossible to live with”.

<https://www.ontrackny.org/Videos>
